# Supplementary material for: Rabies Virus Antibodies from Oral Vaccination as a Correlate of Protection against Lethal Infection in Wildlife
Source: Trop Med Infect Dis. 2017 Jul 21;2(3):31. doi: 10.3390/tropicalmed2030031 (PMC6082110; doi:10.3390/tropicalmed2030031)
Supplement: Supplementary file 1 [file tropicalmed-02-00031-s001.xlsx]

## Sheet: variant 1
Raw data
	animal	animal	type	route	challenge	challenge	challenge	outcome		RFFIT			ELISA
	species	i.d.			on … d	MICLD50	virus	challenge	B0	B28	Bch	B0	B28	Bch
	fox	9647	vacc.	d.o.a.	98	coyote	5	surv.	x	0.98	0.79
	fox	3409	vacc.	d.o.a.	98	coyote	5	surv.	x	0.86	0.67
	fox	1142	vacc.	d.o.a.	98	coyote	5	surv.	x	10.83	7.85
	fox	7275	vacc.	d.o.a.	98	coyote	5	surv.	x	3.96	10.65
	fox	1623	vacc.	d.o.a.	98	coyote	5	surv.	x	1.13	3.76
	fox	4573	vacc.	d.o.a.	98	coyote	5	surv.	<0,5	x	x
	fox	6710	vacc.	d.o.a.	98	coyote	5	surv.		5.99	5.14
	fox	9489	vacc.	d.o.a.	98	coyote	5	surv.		8.67	19.73
	fox	1694	vacc.	d.o.a.	98	coyote	5	surv.		3.24	1.61
	fox	4715	vacc.	d.o.a.	98	coyote	5	surv.		2.73	0.54
	fox	6985	vacc.	d.o.a.	98	coyote	5	surv.		0.87	0.43
	fox	6570	vacc.	d.o.a.	98	coyote	5	surv.		2.72	3.82
	fox	2456	cont.	-	0	coyote	5	died		x	x
	fox	0344	cont.	-	0	coyote	5	died		x	x
	fox	8629	cont.	-	0	coyote	5	died		x	x
	fox	6170	vacc.	d.o.a.	62	coyote	5	surv.	0.07	1.97	4.5
	fox	7287	vacc.	d.o.a.	62	coyote	5	surv.	0.06	1.97	4.5
	fox	9788	vacc.	d.o.a.	62	coyote	5	surv.	0.06	1.14	1.97
	fox	7879	vacc.	d.o.a.	62	coyote	5	surv.	0.06	30.77	13.5
	fox	0200	vacc.	d.o.a.	62	coyote	5	surv.	0.06	23.28	30.77
	fox	9787	vacc.	d.o.a.	62	coyote	5	surv.	0.06	5.92	7.79
	fox	5823	cont.	-	0	coyote	5	died			x
	fox	2244	cont.	-	0	coyote	5	died			x
	skunk	9889	vacc.	d.o.a.	42	coyote	5	died	0.08	1.1	0.19
	skunk	9891	vacc.	d.o.a.	42	coyote	5	died	0.1	0.07	0.08
	skunk	9790	vacc.	d.o.a.	42	coyote	5	died	0.06	0.04	0.02
	skunk	9791	vacc.	d.o.a.	42	coyote	5	died	0.03	0.04	0.01
	skunk	9894	vacc.	d.o.a.	42	coyote	5	died	0.06	0.03	0.07
	skunk	9794	vacc.	d.o.a.	42	coyote	5	died	0.08	0.05	0.02
	skunk	9892	vacc.	d.o.a.	42	coyote	5	died	0.04	0.03	0.03
	skunk	9895	vacc.	d.o.a.	42	coyote	5	died	0.11	0.06	0.06
	skunk	9899	cont.	-	0	coyote	5	died			0.06
	skunk	9897	cont.	-	0	coyote	5	died			0.05
	raccoon	W1	vacc.	d.o.a.	49	coyote	4.7	surv.	0.03	0.34	0.36
	raccoon	W2	vacc.	d.o.a.	49	coyote	4.7	surv.	0.02	0.55	0.32
	raccoon	W3	vacc.	d.o.a.	49	coyote	4.7	surv.	0.06	0.38	0.1
	raccoon	W4	vacc.	d.o.a.	49	coyote	4.7	surv.	0.04	<0,5	<0,5
	raccoon	W5	vacc.	d.o.a.	49	coyote	4.7	surv.	0.1	<0,5	<0,5
	raccoon	W6	cont.	-	0	coyote	4.7	died			0.08
	raccoon	W7	cont.	-	0	coyote	4.7	died			0.01
	raccoon	W8	cont.	-	0	coyote	4.7	surv.			0.02
	skunk	S1	vacc.	d.o.a.	58	coyote	4.7	died	0.21	0.47	0.07
	skunk	S2	vacc.	d.o.a.	58	coyote	4.7	surv.	0.21	0.19	0.18
	skunk	S3	vacc.	d.o.a.	58	coyote	4.7	died	0.3	0.19	0.15
	skunk	S4	vacc.	d.o.a.	58	coyote	4.7	died	0.1	0.24	0.04
	skunk	S5	vacc.	d.o.a.	58	coyote	4.7	surv.	0.09	1.41	0.22
	skunk	S6	cont.	-	0	coyote	4.7	died			0.06
	skunk	S7	cont.	-	0	coyote	4.7	died			0.44
	skunk	S8	cont.	-	0	coyote	4.7	died			0.06
	skunk	S1	vacc.	d.o.a.	56	coyote	5	surv.		19.2	8.2
	skunk	S2	vacc.	d.o.a.	56	coyote	5	died		0.1	0.2
	skunk	S3	vacc.	d.o.a.	56	coyote	5	surv.		0.8	0.3
	skunk	S4	vacc.	d.o.a.	56	coyote	5	surv.		0.7	1.2
	skunk	S5	vacc.	d.o.a.	56	coyote	5	surv.		1.9	0.9
	skunk	S6	vacc.	d.o.a.	56	coyote	5	surv.		1.6	1.4
	skunk	S12	cont.	-	0	coyote	5	died			0.1
	skunk	S13	cont.	-	0	coyote	5	died			0.1
	skunk	S14	cont.	-	0	coyote	5	died			0.1
	raccoon	WB1	vacc.	d.o.a.	56	coyote	5	surv.		n.a.	59.1
	raccoon	WB2	vacc.	d.o.a.	56	coyote	5	surv.		1.8	7.1
	raccoon	WB3	vacc.	d.o.a.	56	coyote	5	surv.		7.3	8.6
	fox	Fu4	vacc.	bait	56	coyote	4.95	surv.	0.05	0.36	1.17	17.81	79.944	87.702
	fox	Fu5	vacc.	bait	56	coyote	4.95	surv.	0.16	0.57	2.09	20.118	83.31	96.109
	fox	Fu6	vacc.	bait	56	coyote	4.95	surv.	0.15	0.15	0.69	15.802	73.678	88.276
	fox	Fu7	vacc.	bait	56	coyote	4.95	died	0.22	0.07	0.61	1.0624	25.376	20.685
	fox	Fu8	vacc.	bait	56	coyote	4.95	died	0.5	0.62	2.73	12.669	28.651	18.002
	fox	Fu9	vacc.	bait	56	coyote	4.95	died	0.14	0.29	1.42	18.544	59.163	59.747
	fox	Fu10	cont.	-	0	coyote	4.95	died
	fox	Fu11	cont.	-	0	coyote	4.95	died
	rac. dog	Mh4	vacc.	bait	56	coyote	4.95	surv.	0.45	12.22	5.94	20.607	95.747	99.055
	rac. dog	Mh5	vacc.	bait	56	coyote	4.95	surv.	0.36	1.67	1.74	14.122	82.605	89.744
	rac. dog	Mh6	vacc.	bait	56	coyote	4.95	surv.	0.56	6.61	4.33	34.302	94.048	96.712
	rac. dog	Mh7	vacc.	bait	56	coyote	4.95	surv.	0.55	2.51	0.98	19.19	82.847	92.791
	rac. dog	Mh8	vacc.	bait	56	coyote	4.95	surv.	0.22	0.51	0.86	23.34	72.048	84.385
	rac. dog	Mh9	vacc.	bait	56	coyote	4.95	surv.	0.05	8.78	1.93	12.23	90.448	94.892
	rac. dog	Mh10	cont.	-	0	coyote	4.95	died
	rac. dog	Mh11	cont.	-	0	coyote	4.95	died
	skunk	Sk1	vacc.	d.o.a.	28	dog	4.56	died	0.02	0.02	0.02	27.847	58.041	58.041
	skunk	Sk2	vacc.	d.o.a.	28	dog	4.56	died	0.01	0.02	0.02	30.109	31.828	31.828
	skunk	Sk7	vacc.	d.o.a.	28	dog	4.56	died	0.02	0.02	0.02	26.208	20.718	20.718
	skunk	Sk8	vacc.	d.o.a.	28	dog	4.56	died	0.04	0.02	0.02	24.76	21.955	21.955
	skunk	Sk3	vacc.	d.o.a.	28	dog	4.56	surv.	0.02	0.03	0.03	24.237	27.424	27.424
	skunk	Sk4	vacc.	d.o.a.	28	dog	4.56	died	0.05	0.07	0.07	24.86	25.977	25.977
	skunk	Sk5	vacc.	d.o.a.	28	dog	4.56	died	0.03	0.05	0.05	15.882	19.059	19.059
	skunk	Sk6	vacc.	d.o.a.	28	dog	4.56	surv.	0.04	0.05	0.05	26.53	24.519	24.519
	skunk	Sk17	cont.	-	0	dog	4.56	surv.			<0,5	36.253		36.253
	skunk	Sk18	cont.	-	0	dog	4.56	surv.			<0,5	24.428		24.428
	skunk	Sk11	vacc.	d.o.a.	56	dog	4.56	died	0.02	0.03	<0,5	24.539	58.001	38.062
	skunk	Sk12	vacc.	d.o.a.	56	dog	4.56	died	0.04	0.03	<0,5	33.498	66.638	62.023
	skunk	Sk13	vacc.	d.o.a.	56	dog	4.56	died	0.06	0.03	<0,5	16.988	20.577	25.444
	skunk	Sk9	vacc.	d.o.a.	56	dog	4.56	died	0.06	0.02	<0,5	30.169	26.882	23.765
	skunk	Sk10	vacc.	d.o.a.	56	dog	4.56	died	0.03	0.02	<0,5	24.72	24.066	16.193
	skunk	Sk15	vacc.	d.o.a.	56	dog	4.56	died	0.02	0.03	<0,5	21.894	25.293	19.471
	skunk	Sk16	vacc.	d.o.a.	56	dog	4.56	died	0.02	0.02	<0,5	30.27	31.265	20.839
	skunk	Sk19	cont.	-	0	dog	4.56	died				27.083		27.083
	skunk	Sk20	cont.	-	0	dog	4.56	died				25.062		25.062
	fox	Fu1	vacc.	d.o.a.	56	fox	6.7	surv.	<0,5	4.47701	2.24687	14.061	80.386	95.159
	fox	Fu2	vacc.	d.o.a.	56	fox	6.7	died	<0,5	5.64942	2.54595	8.9864	78.586	89.26
	fox	Fu3	vacc.	d.o.a.	56	fox	6.7	died	0.0154929	0.209886	1.32821	17.927	80.477	83.885
	fox	Fu4	vacc.	bait	56	fox	6.7	surv.	0.0252308	0.0793277	0.366944	23.785	43.032	-
	fox	Fu5	vacc.	bait	56	fox	6.7	died	0.11	0.11105	0.108339	27.776	21.876	19.477
	fox	Fu6	vacc.	bait	56	fox	6.7	surv.	<0,5	1.5554	1.71677	25.209	76.578	-
	fox	Fu11	cont.	-	0	fox	6.7	died			0.0693065	21.86	-	-
	fox	Fu12	cont.	-	0	fox	6.7	died			0.0698356	24.434	-	-
	fox	Fu13	cont.	-	0	fox	6.7	died			0.175156	26.184	-	-
	fox	Fu14	cont.	-	0	fox	6.7	died			0.0280501	17.485	-	-
	mongoose	Mu3	vacc.	d.o.a.	56	dog	4.16	died	<0,5	<0,5	<0,5	3.0167	28.092	38.126
	mongoose	Mu4	vacc.	d.o.a.	56	dog	4.16	died	<0,5	0.612087	<0,5	-0.38105		60.82
	mongoose	Mu5	vacc.	d.o.a.	56	dog	4.16	died	<0,5	<0,5	<0,5	-8.4043	5.0913	26.79
	mongoose	Mu7	vacc.	d.o.a.	56	dog	4.16	died	<0,5	<0,5	<0,5	10.024	33.84	45.991
	mongoose	Mu1	vacc.	bait	56	dog	4.16	died	<0,5	<0,5	<0,5	15.941	21.127	18.407
	mongoose	Mu2	vacc.	bait	56	dog	4.16	died	<0,5	<0,5	<0,5	14.501		15.2
	mongoose	Mu6	vacc.	bait	56	dog	4.16	died	<0,5	<0,5	<0,5	81.027	19
	mongoose	Mu9	vacc.	bait	56	dog	4.16	died	<0,5	<0,5	<0,5	4.1704	22.842	26.25
	mongoose	Mu10	vacc.	bait	56	dog	4.16	died	<0,5	<0,5	0.385674	-2.3075	21.328	18.756
	mongoose	Mu11	vacc.	bait	56	dog	4.16	died	<0,5	<0,5	<0,5	8.4361	15.21	19.402
	mongoose	Mu14	vacc.	bait	56	dog	4.16	died	<0,5	<0,5	<0,5	16.724	13.94	20.386
	mongoose	Mu19	vacc.	bait	56	dog	4.16	died	<0,5	<0,5	<0,5	18.629	11.379
	mongoose	Mu12	vacc.	bait	56	dog	4.16	surv.	<0,5	3.52884	2.07151	25.287	87.441	90.987
	mongoose	Mu15	vacc.	bait	56	dog	4.16	surv.	<0,5	3.2414	3.35894	17.677		92.173
	mongoose	Mu16	vacc.	bait	56	dog	4.16	surv.	<0,5	7.33742	9.62537	13.104	94.353	98.735
	mongoose	Mu8	cont.	-	0	dog	4.16	died			<0,5	35.385
	mongoose	Mu13	cont.	-	0	dog	4.16	died			<0,5	23.932
	mongoose	Mu17	cont.	-	0	dog	4.16	died			<0,5	23.551		26.97
	mongoose	Mu18	cont.	-	0	dog	4.16	died			<0,5	20.852
	raccoon	Wa 5	vacc.	d.o.a.	56	dog	4.56	surv.	0.02	0.12	0.07	2.9665	70.377	77.618
	raccoon	Wa 6	vacc.	d.o.a.	56	dog	4.56	surv.	0.06	0.17	1.89	0.191154	72.433	77.516
	raccoon	Wa 11	vacc.	d.o.a.	56	dog	4.56	died	0.02	0.04	0.89	7.7969	20.326	19.709
	raccoon	Wa 12	vacc.	d.o.a.	56	dog	4.56	surv.	0.02	0.15	0.06	14.384	66.238	82.337
	raccoon	Wa 13	vacc.	d.o.a.	56	dog	4.56	died	0.02	0.06	0.04	5.8068	15.636	15.103
	raccoon	Wa 14	vacc.	d.o.a.	56	dog	4.56	died	0.02	0.03	0.2	6.7131	33.771	43.936
	raccoon	Wa 15	vacc.	d.o.a.	56	dog	4.56	died	0.02	0.03	(-)	17.972	8.3668	32.781
	raccoon	Wa 16	vacc.	d.o.a.	56	dog	4.56	surv.	0.03	0.03	0.11	7.2643	42.133	55.428
	raccoon	Wa 1	vacc.	bait	56	dog	4.56	surv.	0.07	0.58	0.34	1.8359	48.225	72.732
	raccoon	Wa 2	vacc.	bait	56	dog	4.56	died	0.02	0.04	0.04	-3.3495	27.324	15.589
	raccoon	Wa 3	vacc.	bait	56	dog	4.56	surv.	0.02	0.02	0.04	7.7221	33.294	46.889
	raccoon	Wa 4	vacc.	bait	56	dog	4.56	surv.	0.06	0.09	0.1	4.4427	17.691	18.644
	raccoon	Wa 17	vacc.	d.o.a.	56	dog	4.56	died	0.2	0.05	0.11	14.655	21.924	32.865
	raccoon	Wa 18	vacc.	d.o.a.	56	dog	4.56	surv.	0.02	0.2	0.04	9.2264	80.122	92.353
	raccoon	Wa 19	vacc.	d.o.a.	56	dog	4.56	surv.	0.02	0.02	5.4	4.1717	12.926	26.25
	raccoon	Wa 20	vacc.	d.o.a.	56	dog	4.56	surv.	0.03	0.3	0.26	5.2182	89.447	86.485
	raccoon	Wa 7	vacc.	bait	56	dog	4.56	died	0.02	0.02	0.09	13.767	15.683	17.822
	raccoon	Wa 8	vacc.	bait	56	dog	4.56	died	0.02	0.09	0.09	1.8266	20.326	10.656
	raccoon	Wa 9	vacc.	bait	56	dog	4.56	surv.	0.02	0.12	0.05	-1.4996	22.98	42.628
	raccoon	Wa 10	vacc.	bait	56	dog	4.56	surv.	0.02	0.51	0.3	0.313		100.41
	raccoon	Wa 21	cont.	-	0	dog	4.56	died			0.02	10.357		10.357
	raccoon	Wa 22	cont.	-	0	dog	4.56	died			0.02	5.6199		5.6199
	raccoon	Wa 23	cont.	-	0	dog	4.56	died			0.05	28.772		28.772
	raccoon	Wa 24	cont.	-	0	dog	4.56	died			0.05	9.0208		9.0208
	dog	Hu 1	vacc.	bait	56	dog	3.6	surv.	0.08	0.22	0.11	15.364	66.871	68.177
	dog	Hu 2	vacc.	bait	56	dog	3.6	surv.	0.09	0.3	0.08	14.37	48.35	40.961
	dog	Hu 3	vacc.	bait	56	dog	3.6	surv.	0.5	0.67	0.26	11.567	70.259	67.32
	dog	Hu 4	vacc.	bait	56	dog	3.6	surv.	0.14	0.35	0.13	20.821	61.645	62.176
	dog	Hu 5	vacc.	d.o.a.	56	dog	3.6	surv.	0.06	0.87	0.62	22.195	69.96	80.738
	dog	Hu 6	vacc.	d.o.a.	56	dog	3.6	surv.	0.06	0.42	0.21	24.25	58.121	49.861
	dog	Hu 7	vacc.	d.o.a.	56	dog	3.6	surv.	0.07	0.44	0.25	20.167	63.387	63.224
	dog	Hu 8	vacc.	d.o.a.	56	dog	3.6	surv.	0.13	0.46	0.12	21.487	56.746	61.359
	dog	Hu 17	vacc.	bait	56	dog	3.6	surv.	0.08	0.18	0.14	22.236	52.637	43.995
	dog	Hu 18	vacc.	bait	56	dog	3.6	surv.	0.05	0.7	0.42	23.039	68.64	79.935
	dog	Hu 19	vacc.	bait	56	dog	3.6	surv.	0.05	0.49	0.37		70.314	76.165
	dog	Hu 20	vacc.	bait	56	dog	3.6	surv.	0.04	0.57	0.08		51.276	48.214
	dog	Hu 9	vacc.	bait	56	dog	3.6	surv.	0.05	7.02	0.95	16.861	89.243	96.877
	dog	Hu 10	vacc.	bait	56	dog	3.6	surv.	0.29	1.36	0.64	22.671	85.405	93.461
	dog	Hu 11	vacc.	bait	56	dog	3.6	surv.	0.15	1.05	0.69		86.494	93.298
	dog	Hu 12	vacc.	bait	56	dog	3.6	surv.	0.5	4.72	0.73	29.829	82.18	90.114
	dog	Hu 21	cont.	-	0	dog	3.6	died			0.28	27.72		27.72
	dog	Hu 22	cont.	-	0	dog	3.6	died			0.25	26.141		26.141
	dog	Hu 23	cont.	-	0	dog	3.6	died			0.34	17.555		17.555
	dog	Hu 24	cont.	-	0	dog	3.6	died			0.5	21.787		21.787
	fox	Fu 3	vacc.	bait	56	fox	4.6	surv.				-0.36	77.654	94.695
	fox	Fu 4	vacc.	bait	56	fox	4.6	surv.				3.43	80.639	93.631
	fox	Fu 5	vacc.	bait	56	fox	4.6	surv.				5.85	78.457	91.931
	fox	Fu 11	vacc.	bait	56	fox	4.6	surv.				1.96	84.608	96.456
	fox	Fu 8	vacc.	bait	56	fox	4.6	surv.				1.91	87.272	98.712
	fox	Fu 10	vacc.	bait	56	fox	4.6	surv.				2.15	92.098	99.26
	fox	Fu 6	vacc.	d.o.a.	56	fox	4.6	surv.				4.33	26.342	32.192
	fox	Fu 7	vacc.	d.o.a.	56	fox	4.6	died				3.39	27.359	17.031
	fox	Fu 9	vacc.	d.o.a.	56	fox	4.6	surv.				-0.05	78.156	95.445
	fox	Fu 2	cont.	-	0	fox	4.6	died						1.911
	fox	Fu 12	cont.	-	0	fox	4.6	died						19.615
	rac. dog	M1	vacc.	bait	190	fox	0.7	surv.	0.02	1.23374	1.7537	15.027	89.087	98.489
	rac. dog	M2	vacc.	bait	190	fox	0.7	surv.	0.11	2.32881	3.06084	28.934	84.881	95.946
	rac. dog	M3	vacc.	bait	190	fox	0.7	surv.	0.131529	1.64561	4.78847	-20.537	89.407	95.054
	rac. dog	M4	vacc.	bait	190	fox	0.7	died	0.0368709	0.119276	0.107411	20.339	25.599	13.19
	rac. dog	M5	vacc.	bait	190	fox	0.7	surv.	0.100557	1.42981	1.19187	23.17	82.004	99.69
	rac. dog	M6	vacc.	bait	190	fox	0.7	surv.	0.0737714	0.123666	0.119666	27.712	3.9899	26.967
	rac. dog	M7	vacc.	bait	190	fox	0.7	surv.	0.0362583	0.638669	0.427279	17.255	74.2	89.132
	rac. dog	M8	vacc.	bait	190	fox	0.7	surv.	0.112362	3.87299	12.2679	16.823	91.582	99.718
	rac. dog	M9	vacc.	bait	190	fox	0.7	surv.	0.114037	2.47855	7.09752	8.2279	90.603	95.936
	rac. dog	M10	vacc.	bait	190	fox	0.7	surv.	0.125531	0.0592036	0.531373	14.368	66.23	83.473
	rac. dog	M11	vacc.	bait	190	fox	0.7	surv.	0.063611	3.5662	11.3151	9.8735	89.85	99.897
	rac. dog	M12	vacc.	bait	190	fox	0.7	surv.	0.0250078	1.34456	1.02768	28.389	84.654	98.761
	rac. dog	M13	vacc.	bait	190	fox	0.7	surv.	0.0294018	0.0996023	0.147422	38.479	-1.6496	24.002
	rac. dog	M14	vacc.	bait	190	fox	0.7	surv.	0.106477	0.104062	0.200811	31.012	14.578	26.113
	rac. dog	M15	vacc.	bait	190	fox	0.7	surv.	0.134583	0.463125	0.319259	23.903	71.529	71.254
	rac. dog	M16	vacc.	bait	190	fox	0.7	surv.	0.0851827	0.838445	0.699818	20.753	82.004	95.242
	rac. dog	M17	vacc.	bait	190	fox	0.7	surv.	0.0250078	2.36601	1.54262	17.575	91.077	98.489
	rac. dog	M18	vacc.	bait	190	fox	0.7	surv.	0.0368709	3.32331	0.518209	17.697	90.097	98.33
	rac. dog	M19	vacc.	bait	190	fox	0.7	surv.	0.183754	3.05972	2.00993	24.825	88.149	99.606
	rac. dog	M20	vacc.	bait	190	fox	0.7	surv.	0.102509	1.89989	1.67483	26.235	86.396	101.06
	rac. dog	M21	vacc.	bait	190	fox	0.7	surv.	0.0250078	3.79462	0.547812	33.655	80.303	98.217
	rac. dog	M22	vacc.	bait	190	fox	0.7	surv.	0.0250078	1.34005	3.44815	30.363	86.18	100.06
	rac. dog	M23	vacc.	bait	190	fox	0.7	died	0.106477	0.0612448	0.0491495	28.849	22.548	20.267
	rac. dog	M24	vacc.	bait	190	fox	0.7	surv.	0.0412586	3.11827	0.898659	25.408	89.262	98.977
	rac. dog	M25	vacc.	bait	190	fox	0.7	surv.	0.0776384	1.48648	0.931788	18.619	85.458	94.022
	rac. dog	M26	vacc.	bait	190	fox	0.7	surv.	0.308384	2.99093	2.46734	19.822	87.644	98.095
	rac. dog	M27	vacc.	bait	190	fox	0.7	surv.	0.160207	2.5035	1.03799	26.367	81.798	99.062
	rac. dog	M28	vacc.	bait	190	fox	0.7	surv.	0.114037	0.0943355	0.349686	35.263	56.673	94.688
	rac. dog	M29	vacc.	bait	190	fox	0.7	surv.	0.129935	0.365612	0.371479	38.262	66.23	96.903
	rac. dog	M30	vacc.	bait	190	fox	0.7	surv.	0.112362	0.0937318	0.0975907	35.658	14.661	48.524
	rac. dog	M31	cont.	-	0	fox	0.7	surv.	0.10125	0.189852	0.0591072	39.71	26.589	23.608
	rac. dog	M32	cont.	-	0	fox	0.7	died	0.129935	0.151412	0.0857226	31.323	26.919	18.549
	rac. dog	M33	cont.	-	0	fox	0.7	died	0.0454748	0.148201	0.0577314	24.909	27.641	11.079
	rac. dog	M34	cont.	-	0	fox	0.7	surv.	0.0399539	0.109285	0.0365452	24.101	32.156	18.174
	rac. dog	M35	cont.	-	0	fox	0.7	surv.	0.0399539	0.0594361	0.0395903	24.881	17.496	20.661
	rac. dog	M36	cont.	-	0	fox	0.7	died	0.06	0.121162	0.0519034	38.939	25.465	25.419
	rac. dog	M37	cont.	-	0	fox	0.7	died	0.04	0.0466144	0.117653	40.594	7.5983	23.129
	rac. dog	M38	cont.	-	0	fox	0.7	died	0.02	0.100257	0.126038	32.301	-4.2889	32.823
	rac. dog	M39	cont.	-	0	fox	0.7	surv.	0.31	0.127781	0.110389	36.203	25.826	23.936
	rac. dog	M40	cont.	-	0	fox	0.7	surv.	0.07	0.179896	0.213714	30.711	28.311	20.417
	rac. dog	M41	cont.	-	0	fox	0.7	died	0.09	0.1234	0.0961998	23.8	26.321	11.557
	rac. dog	M42	cont.	-	0	fox	0.7	surv.	0.07	0.154624	0.0839376	19.371	35.662	23.054
	mongoose	Mu 14	vacc.	bait	42	dog	4	surv.	0.03	7.22384	2.7	19.214	93.567	95.972
	mongoose	Mu 15	vacc.	bait	42	dog	4	surv.	0.03	1.53345	0.51	18.487	90.671	90.564
	mongoose	Mu 16	vacc.	bait	42	dog	4	died	0.1	0.223526	0.49	15.589	14.75	23.721
	mongoose	Mu 17	vacc.	bait	42	dog	4	died	0.29	0.260799	0.44	-2.5806	15.23	18.121
	mongoose	Mu 18	vacc.	bait	42	dog	4	surv.	0.32	0.517812	0.35	1.9238	60.52	69.024
	mongoose	Mu 19	vacc.	bait	42	dog	4	died	0.02	0.0447041	0.06	4.0821	13.29	16.459
	mongoose	Mu 1	vacc.	d.o.a.	42	dog	4	surv.	0.11	18.2978	11	12.974	99.15	98.83
	mongoose	Mu 2	vacc.	d.o.a.	42	dog	4	surv.	0.06	22.695	9.42	3.6716	99.11	99.836
	mongoose	Mu 3	vacc.	d.o.a.	42	dog	4	surv.	0.03	24.5583	14.36	6.6979	100.13	99.836
	mongoose	Mu 4	vacc.	d.o.a.	42	dog	4	surv.	0.03	2.48368	2.2	9.912	95.71	95.549
	mongoose	Mu 5	vacc.	d.o.a.	42	dog	4	surv.	0.03	19.0412	11.71	23.824	99.55	99.01
	mongoose	Mu 11	cont.	-	0	dog	4	died			0.03
	mongoose	Mu 12	cont.	-	0	dog	4	died			0.03	15.331		15.331
	mongoose	Mu 13	cont.	-	0	dog	4	died			0.02	13.806		13.806
	raccoon	Wa 4	cont.	-	0	raccoon	6.2	died				2.3398		2.3398
	raccoon	Wa 3	cont.	-	0	raccoon	6.2	died				-10.516		-10.516
	raccoon	Wa 2	cont.	-	0	raccoon	6.2	died				-1.356		-1.356
	raccoon	Wa 1	cont.	-	0	raccoon	6.2	died				-3.7822		-3.7822
	raccoon	Wa 12	cont.	-	0	raccoon	4.8	died				4.2874		4.2874
	raccoon	Wa 11	cont.	-	0	raccoon	4.8	died				1.9543		1.9543
	raccoon	Wa 10	cont.	-	0	raccoon	4.8	died				6.4278		6.4278
	raccoon	Wa 9	cont.	-	0	raccoon	4.8	died				-3.4565		-3.4565
	raccoon	Wa 8	cont.	-	0	raccoon	4.2	surv.				1.6684		1.6684
	raccoon	Wa 7	cont.	-	0	raccoon	4.2	died				0.17947		0.17947
	raccoon	Wa 6	cont.	-	0	raccoon	4.2	surv.				-3.3768		-3.3768
	raccoon	Wa 5	cont.	-	0	raccoon	4.2	died				-0.78437		-0.78437
	fox	Fu 13	cont.	-	0	fox	4.7	died				6.0676		6.0676
	fox	Fu 14	cont.	-	0	fox	4.7	died				1.3286		1.3286
	fox	Fu 15	cont.	-	0	fox	4.7	died				7.4331		7.4331
	fox	Fu 16	cont.	-	0	fox	4.7	died				6.5696		6.5696
	fox	Fu 17	cont.	-	0	fox	3.7	died				11.322		11.322
	fox	Fu 18	cont.	-	0	fox	3.7	died				12.554		12.554
	fox	Fu 19	cont.	-	0	fox	3.7	died				16.57		16.57
	fox	Fu 20	cont.	-	0	fox	3.7	died				15.633		15.633
	fox	Fu 21	cont.	-	0	fox	2.7	died				7.8815		7.8815
	fox	Fu 22	cont.	-	0	fox	2.7	died				7.8548		7.8548
	fox	Fu 23	cont.	-	0	fox	2.7	died				7.0917		7.0917
	fox	Fu 24	cont.	-	0	fox	2.7	died				3.243		3.243
	fox	Fu 39	cont.	-	0	fox	2.3	died				10.291		10.291
	fox	Fu 40	cont.	-	0	fox	2.3	died				2.9886		2.9886
	fox	Fu 41	cont.	-	0	fox	2.3	died				2.259		2.259
	fox	Fu 42	cont.	-	0	fox	2	died				10.894		10.894
	fox	Fu 43	cont.	-	0	fox	2	died				3.7985		3.7985
	fox	Fu 44	cont.	-	0	fox	2	died				3.0087		3.0087
	rac. dog	Mh 13	cont.	-	0	fox	3	died				6.8842		6.8842
	rac. dog	Mh 14	cont.	-	0	fox	3	died				12.948		12.948
	rac. dog	Mh 15	cont.	-	0	fox	3	died				11.683		11.683
	rac. dog	Mh 16	cont.	-	0	fox	3	died				10.003		10.003
	rac. dog	Mh 17	cont.	-	0	fox	2.7	died				9.5013		9.5013
	rac. dog	Mh 18	cont.	-	0	fox	2.7	died				6.5964		6.5964
	rac. dog	Mh 19	cont.	-	0	fox	2.7	died				7.7209		7.7209
	rac. dog	Mh 20	cont.	-	0	fox	2.7	surv.				7.9083		7.9083
	rac. dog	Mh 25	cont.	-	0	fox	2.7	died				12.875		12.875
	rac. dog	Mh 26	cont.	-	0	fox	2.7	died				14.187		14.187
	rac. dog	Mh 27	cont.	-	0	fox	2.7	died				16.985		16.985
	rac. dog	Mh 28	cont.	-	0	fox	2.7	died				14.367		14.367
	rac. dog	Mh 29	cont.	-	0	fox	2.7	died				14.555		14.555
	rac. dog	Mh 21	cont.	-	0	fox	2.3	died				11.985		11.985
	rac. dog	Mh 22	cont.	-	0	fox	2.3	died				8.2229		8.2229
	rac. dog	Mh 23	cont.	-	0	fox	2.3	died				6.0141		6.0141
	rac. dog	Mh 24	cont.	-	0	fox	2.3	surv.				8.6914		8.6914
	rac. dog	Mh 30	cont.	-	0	fox	2.3	died				25.485		25.485
	rac. dog	Mh 31	cont.	-	0	fox	2.3	died				11.248		11.248
	rac. dog	Mh 32	cont.	-	0	fox	2.3	died				14.227		14.227
	rac. dog	Mh 33	cont.	-	0	fox	2.3	died				4.7892		4.7892
	rac. dog	Mh 34	cont.	-	0	fox	2.3	died				9.8561		9.8561
	rac. dog	MH1	vacc.	d.o.a.	28	fox	2.7	surv.	0.0440036	8.49099	8.49099	14.626	97.154	97.154
	rac. dog	MH3	vacc.	d.o.a.	28	fox	2.7	surv.	<0,5	1.27218	1.27218	23.227	94.353	94.353
	rac. dog	MH4	vacc.	d.o.a.	28	fox	2.7	surv.	0.05	6.7421	6.7421	20.992	94.334	94.334
	rac. dog	MH5	vacc.	d.o.a.	28	fox	2.7	surv.	0.08	<0.5	<0.5	18.678	92.119	92.119
	rac. dog	MH6	vacc.	d.o.a.	28	fox	2	surv.	0.18	4.91258	4.91258	17.188	97.601	97.601
	rac. dog	MH7	vacc.	d.o.a.	28	fox	2	surv.	0.28	3.88714	3.88714	9.5699	95.744	95.744
	rac. dog	MH8	vacc.	d.o.a.	28	fox	2	surv.	0.08	1.4139	1.4139	19.939	84.034	84.034
	rac. dog	MH9	vacc.	d.o.a.	28	fox	2	surv.	0.13	0.562984	0.562984	27.786	88.702	88.702
	rac. dog	MH10	vacc.	d.o.a.	28	fox	2	surv.	0.37	13.3429	13.3429	-4.1369	93.599	93.599
	rac. dog	MH12	vacc.	d.o.a.	28	fox	2	surv.	0.27	3.36806	3.36806	16.701	96.072	96.072
	rac. dog	MH13	vacc.	d.o.a.	28	fox	2	surv.	0.12	1.60358	1.60358	17.099	87.222	87.222
	rac. dog	MH14	vacc.	d.o.a.	28	fox	2	surv.	0.06	0.285399	0.285399	14.765	72.532	72.532
	rac. dog	MH15	vacc.	d.o.a.	28	fox	2.7	surv.	0.12	3.7242	3.7242	4.3653	91.711	91.711
	rac. dog	MH16	vacc.	d.o.a.	28	fox	2.7	surv.	0.16	1.64918	1.64918	13.473	92.357	92.357
	rac. dog	MH17	vacc.	d.o.a.	28	fox	2.7	surv.	0.18	1.24709	1.24709	16.761	90.033	90.033
	rac. dog	MH18	vacc.	d.o.a.	28	fox	2.7	surv.	0.11	7.84915	7.84915	13.612	92.218	92.218
	rac. dog	MH2	cont.	-	0	fox	2.7	surv.	0.08	0.07	0.07	18.728		18.728
	rac. dog	MH11	cont.	-	0	fox	2	surv.	<0,5	0.11	0.11	17.585		17.585
	rac. dog	MH19	cont.	-	0	fox	2.7	died				7.9752		7.9752
	rac. dog	MH20	cont.	-	0	fox	2.7	died				9.7356		9.7356
	rac. dog	MH21	cont.	-	0	fox	2.7	died				5.7932		5.7932
	rac. dog	MH22	cont.	-	0	fox	2.7	died				10.673		10.673
	rac. dog	MH23	cont.	-	0	fox	2.7	died				13.116		13.116
	rac. dog	MH24	cont.	-	0	fox	2	surv.				4.8159		4.8159
	rac. dog	MH25	cont.	-	0	fox	2	died				10.74		10.74
	rac. dog	MH26	cont.	-	0	fox	2	died				8.4639		8.4639
	rac. dog	MH27	cont.	-	0	fox	2	surv.				2.2523		2.2523
	rac. dog	MH28	cont.	-	0	fox	2	surv.				2.8213		2.8213
	rac. dog	MH29	cont.	-	0	fox	1.7	died				1.2818		1.2818
	rac. dog	MH30	cont.	-	0	fox	1.7	died				4.3407		4.3407
	rac. dog	MH31	cont.	-	0	fox	1.7	died				12.821		12.821
	rac. dog	MH32	cont.	-	0	fox	1.7	surv.				10.532		10.532
	rac. dog	MH33	cont.	-	0	fox	1.7	died				5.1171		5.1171
	rac. dog	MH34	cont.	-	0	fox	1.7	died				5.927		5.927
	rac. dog	MH35	cont.	-	0	fox	1.7	died				12.139		12.139
	rac. dog	MH36	cont.	-	0	fox	1.7	died				-2.2055		-2.2055
	fox	fu1	vacc.	bait	50	fox	3	surv.	0.11	4.47	0.72	10.55	73.4	97.33
	fox	fu2	vacc.	bait	50	fox	3	surv.	0.11	0.12	0.01	5.37	22.79	34.51
	fox	fu3	vacc.	bait	50	fox	3	surv.	0.07	3.69	0.06	-10.09	80.6	91.48
	fox	fu4	vacc.	bait	50	fox	3	surv.	0.09	0.18	0.08	6.25	57.85	84.16
	fox	fu5	vacc.	bait	50	fox	3	surv.	0.1	1.98	1.62	8.78	76.14	92.32
	fox	fu6	cont.	-	50	fox	3	died	0.05	0.7	0.08	6.5	13.08	15.75
	fox	fu7	vacc.	bait	50	fox	3	surv.	0.05	13.88	2.72	6.12	84.31	97.25
	fox	fu8	vacc.	bait	50	fox	3	surv.	0.05	1.51	0.26	4.95	71.09	90.58
	fox	fu9	vacc.	bait	50	fox	3	surv.	0.1	1.53	0.12	3.23	53.9	81.82
	fox	fu10	vacc.	bait	50	fox	3	died	0.01	0.09	0.06	9.41	13.14	10.4
	fox	fu11	vacc.	bait	50	fox	3	surv.	0.11	0.59	0.2	7.89	55.63	67.11
	fox	fu12	cont.	-	50	fox	3	died	0.19	0.19	0.14	15.31	19.92	19.82
	fox	fu13	vacc.	bait	50	fox	3	died	0.07	0.15	0.07	10.43	9.11	4.06
	fox	fu14	vacc.	bait	50	fox	3	surv.	0.2	0.48	0.25	10.18	64.67	89.28
	fox	fu15	vacc.	bait	50	fox	3	surv.	0.16	0.17	0.28	7.62	53.78	51.04
	fox	fu16	vacc.	bait	50	fox	3	surv.	0.12	0.51	0.74	2.99	46.26	69.09
	fox	fu17	vacc.	bait	50	fox	3	surv.	0.24	15.82	3.26	7.97	77.92	93.97
	fox	fu18	cont.	-	50	fox	3	died	0.05	0.16	0.05	16.53	18.58	16.48
	fox	fu19	vacc.	bait	50	fox	3	died	0.07	0.15	0.17	19.94	18.76	15.03
	fox	fu20	vacc.	bait	50	fox	3	surv.	0.05	1.43	0.38	10.56	68.06	84.31
	fox	fu21	vacc.	bait	50	fox	3	surv.	0.07	7.18	4.06	16.4	86.59	94.11
	fox	fu22	vacc.	bait	50	fox	3	surv.	0.74	0.68	0.26	5.42	60.1	90.35
	fox	fu23	vacc.	bait	50	fox	3	died	0.62	0.26	0.17	25.04	19.86	18.42
	fox	fu24	cont.	-	50	fox	3	died	0.15	0.14	0.14	18.07	12.1	22.8
	skunk	027-078-593	vacc.	d.o.a.	335	dog(fox)	5.9	surv.	<0.1	12.5	14	6.31	47.86	59
	skunk	027-081-279	vacc.	d.o.a.	335	dog(fox)	5.9	surv.	<0.1	31	11	5.33	50.79	56.73
	skunk	027-083-882	vacc.	d.o.a.	335	dog(fox)	5.9	surv.	<0.1	53	60	11	51.2	58.35
	skunk	027-085-013	cont.	-	335	dog(fox)	5.9	died	<0.1	<0.1	<0.1	0.32	11.71	-3.08
	skunk	027-088-120	vacc.	d.o.a.	335	dog(fox)	5.9	surv.	<0.1	20	11.5	9.77	47.75	55.5
	skunk	027-091-822	vacc.	d.o.a.	335	dog(fox)	5.9	surv.	<0.1	12.5	9.2	4.48	56.41	49.85
	skunk	027-125-839	vacc.	d.o.a.	335	dog(fox)	5.9	surv.	<0.1	34	36.5	16.74	48.83	65.5
	skunk	027-256-609	vacc.	d.o.a.	335	dog(fox)	5.9	surv.	<0.1	28	5.5	7.76	45.18	56.77
	skunk	027-256-881	vacc.	d.o.a.	335	dog(fox)	5.9	surv.	<0.1	59	54	2.43	54.48	55.19
	skunk	027-277-879	vacc.	d.o.a.	335	dog(fox)	5.9	died	<0.1	<0.1	<0.1	8.2	-7.85	10.19
	skunk	027-303-589	cont.	-	335	dog(fox)	5.9	died	<0.1	<0.1	<0.1	-3.4	-0.91	7.54
	skunk	027-309-119	cont.	-	335	dog(fox)	5.9	died	<0.1	<0.1	<0.1	-3.47	11.71	12.19
	skunk	027-316-614	vacc.	d.o.a.	335	dog(fox)	5.9	surv.	<0.1	131	250	4.45	44.39	57.5
	skunk	067-276-856	vacc.	bait	335	dog(fox)	5.9	surv.	<0.1	0.3	0.4	11.79	29.22	45.35
	skunk	067-591-041	vacc.	d.o.a.	335	dog(fox)	5.9	surv.	<0.1	31	14	2.9	49.02	60.65
	skunk	067-592-337	vacc.	bait	335	dog(fox)	5.9	died	<0.1	<0.1	<0.1	-7.53	-1.42	23.69
	skunk	067-597-857	vacc.	bait	335	dog(fox)	5.9	surv.	<0.1	<0.1	<0.1	1.92	19.58	24.19
	skunk	067-601-261	vacc.	bait	335	dog(fox)	5.9	died	<0.1	<0.1	<0.1	-2.96	15.67	14.15
	skunk	067-605-591	cont.	-	335	dog(fox)	5.9	died	<0.1	<0.1	<0.1	1.32	0.19	16
	skunk	067-613-271	vacc.	d.o.a.	335	dog(fox)	5.9	surv.	<0.1	30	11.5	0.88	47.73	60.35
	skunk	067-617-065	vacc.	d.o.a.	335	dog(fox)	5.9	surv.	<0.1	0.5	0.4	4.7	33.51	43.65
	skunk	067-618-827	vacc.	bait	335	dog(fox)	5.9	died	<0.1	<0.1	<0.1	3.85	2.9	15.31
	skunk	067-623-076	vacc.	d.o.a.	335	dog(fox)	5.9	surv.	<0.1	77	67.5	0.85	48.23	62.69
	skunk	067-632-380	vacc.	-	335	dog(fox)	5.9	died	<0.1	<0.1	<0.1	-4.95	-9.02	8.62
	fox	F1	vacc.	bait	190	fox	0.7	surv.	0.07	1.15	0.19	23.16	86.427	94.416
	fox	F2	vacc.	bait	190	fox	0.7	died	0.07	0.21	0.11	34.388	68.323	78.49
	fox	F3	vacc.	bait	190	fox	0.7	surv.	0.06	0.25	0.13	38.968	70.509	52.738
	fox	F4	vacc.	bait	190	fox	0.7	surv.	0.02	2.32	4.59	33.523	90.036	99.775
	fox	F5	vacc.	bait	190	fox	0.7	surv.	0.09	1.64	1.46	33.702	89.304	97.701
	fox	F6	vacc.	bait	190	fox	0.7	surv.	0.02	2.77	1.23	29.677	88.716	98.658
	fox	F7	vacc.	bait	190	fox	0.7	surv.	0.06	0.32	0.26	23.988	80.643	86.833
	fox	F8	vacc.	bait	190	fox	0.7	surv.	0.02	1.98	0.68	21.609	87.139	94.744
	fox	F9	vacc.	bait	190	fox	0.7	surv.	0.02	2.55	0.68	29.197	85.829	90.24
	fox	F10	vacc.	bait	190	fox	0.7	surv.	0.07	1.1	0.27	32.846	82.674	93.205
	fox	F11	vacc.	bait	190	fox	0.7	surv.	0.04	1.3	0.08	40.585	75.014	62.555
	fox	F12	vacc.	bait	190	fox	0.7	surv.	0.06	1.61	0.04	34.943	50.436	63.399
	fox	F13	vacc.	bait	190	fox	0.7	surv.	0.09	2.56	2.12	31.078	86.778	100.23
	fox	F14	vacc.	bait	190	fox	0.7	surv.	0.09	6.04	1.54	26.489	89.314	100.66
	fox	F15	vacc.	bait	190	fox	0.7	surv.	0.04	0.5	0.11	24.815	75.457	79.888
	fox	F16	vacc.	bait	190	fox	0.7	surv.	0.06	1.27	0.95	24.665	85.468	99.043
	fox	F17	vacc.	bait	190	fox	0.7	surv.	0.06	2.6	1.81	25.107	78.54	100.23
	fox	F18	vacc.	bait	190	fox	0.7	surv.	0.09	2.06	0.63	32.442	73.045	94.989
	fox	F19	vacc.	bait	190	fox	0.7	surv.	0.08	0.5	0.67	33.626	73.684	97.438
	fox	F20	vacc.	bait	190	fox	0.7	surv.	0.07	0.69	1.44	32.479	87.207	99.324
	fox	F21	vacc.	bait	190	fox	0.7	surv.	0.06	2.7	1.47	28.793	85.073	100.29
	fox	F22	vacc.	bait	190	fox	0.7	surv.	0.08	4.11	2.04	30.711	86.521	100.26
	fox	F23	vacc.	bait	190	fox	0.7	surv.	0.05	1.41	1.74	23.885	88.302	98.508
	fox	F24	vacc.	bait	190	fox	0.7	surv.	0.03	0.82	0.35	24.909	82.983	97.363
	fox	F25	vacc.	bait	190	fox	0.7	surv.	0.07	3.08	2.17	21.505	89.584
	fox	F26	vacc.	bait	190	fox	0.7	surv.	0.07	1.46	8.75	26.583	89.131	100.47
	fox	F27	vacc.	bait	190	fox	0.7	surv.	0.08	0.43	0.23	36.598	73.795	86.655
	fox	F28	vacc.	bait	190	fox	0.7	surv.	0.05	0.65	0.6	28.991	77.676
	fox	F29	vacc.	bait	190	fox	0.7	surv.	0.09	0.13	0.17	33.278	60.548	92.652
	fox	F31	cont.	-	0	fox	0.7	died	0.04		0.17	22.794		25.513
	fox	F32	cont.	-	0	fox	0.7	died	0.05		0.02	21.317		24.978
	fox	F33	cont.	-	0	fox	0.7	died	0.1		0.21	15.722		20.839
	fox	F34	cont.	-	0	fox	0.7	died	0.11		0.14	28.304		17.17
	fox	F35	cont.	-	0	fox	0.7	died	0.1		0.12	26.395		18.577
	fox	F36	cont.	-	0	fox	0.7	died	0.07		0.15	26.922		22.021
	fox	F37	cont.	-	0	fox	0.7	died	0.05		0.15	26.762		22.312
	fox	F38	cont.	-	0	fox	0.7	died	0.06		0.13	27.204		23.073
	fox	F39	cont.	-	0	fox	0.7	died	0.26		0.35	22.483		20.783
	fox	F40	cont.	-	0	fox	0.7	died	0.38		0.11	10.41		21.336
	fox	F41	cont.	-	0	fox	0.7	died	0.11		0.17	9.0366		19.938
	fox	F42	cont.	-	0	fox	0.7	died	0.36		0.13	18.29		13.341
	rac. Dog	MH1	vacc.	bait	183	fox	3	surv.	0.124669	5.59648	2.4302	11.973	97.978	100.92
	rac. Dog	MH2	vacc.	bait	183	fox	3	surv.	0.115418	4.2473	1.38525	18.04	97.472	100.63
	rac. Dog	MH45/17	vacc.	bait	183	fox	3	surv.	0.08	4.29	6.64	24.55	99.97	101.42
	rac. Dog	MH4	vacc.	bait	183	fox	3	surv.	0.08788	4.96739	2.21037	23.55	94.458	96.143
	rac. Dog	MH5	vacc.	bait	183	fox	3	surv.	0.10296	4.56013	1.93781	20.028	99.531	100.86
	rac. Dog	MH6	vacc.	bait	183	fox	3	surv.	0.0739101	8.31076	8.19316	25.445	100.59	100.91
	rac. Dog	MH7	vacc.	bait	183	fox	3	surv.	0.0975837	3.49727	1.31973	26.733	98.95	100.69
	rac. Dog	MH8	vacc.	bait	183	fox	3	surv.	0.117085	12.2635	7.4795	19.884	100.18	101.06
	rac. Dog	MH45/21	vacc.	bait	183	fox	3	surv.	0.1	0.44	2.58	18.1	96.45	100.22
	rac. Dog	MH10	vacc.	bait	183	fox	3	surv.	0.0825478	6.26682	1.60907	29.359	98.601	99.88
	rac. Dog	MH45/22	vacc.	bait	183	fox	3	surv.	0.06	1.29	3.07	20.28	98.32	99.76
	rac. Dog	MH12	vacc.	bait	183	fox	3	surv.	0.117085	8.41915	1.77013	20.1	99.514	100.63
	rac. Dog	MH13	vacc.	bait	183	fox	3	surv.	0.117085	7.69598	4.94347	29.782	100.2	100.98
	rac. Dog	MH14	vacc.	bait	183	fox	3	surv.	0.117085	2.06063	2.47309	29.885	98.485	100.66
	rac. Dog	MH45/23	vacc.	bait	183	fox	3	surv.	0.1	2.89	12.58	25.99	100.29	100.98
	rac. Dog	MH16	vacc.	bait	183	fox	3	surv.	0.139498	2.18714	1.62242	22.005	100.2	101.13
	rac. Dog	MH17	vacc.	bait	183	fox	3	surv.	0.10296	3.3972	4.74997	16.196	100.44	100.83
	rac. Dog	MH18	vacc.	bait	183	fox	3	surv.	0.112959	1.10941	2.47736	10.006	95.023	98.493
	rac. Dog	MH45/24	vacc.	bait	183	fox	3	surv.	0.08	0.97	4.34	17.36	91.39	97.51
	rac. Dog	MH20	vacc.	bait	183	fox	3	surv.	0.0740182	21.7932	8.46139	24.972	100.83	100.47
	rac. Dog	MH21	vacc.	bait	183	fox	3	surv.	0.117803	5.56785	12.6434	25.569	100.19	100.82
	rac. Dog	MH22	vacc.	bait	183	fox	3	surv.	0.0904603	3.41314	1.77955	25.641	100.52	100.93
	rac. Dog	MH23	vacc.	bait	183	fox	3	surv.	0.117085	2.98617	4.62508	26.352	100.24	100.92
	rac. Dog	MH26	vacc.	bait	183	fox	3	surv.	0.175198	0.218736	1.62408	9.5015	78.783	89.393
	rac. Dog	MH27	vacc.	bait	183	fox	3	surv.	0.232228	3.13333	11.9	34.077	97.181	99.772
	rac. Dog	MH28	vacc.	bait	183	fox	3	surv.	0.143468	2.28231	1.42959	25.775	98.045	98.742
	rac. Dog	MH29	vacc.	bait	183	fox	3	surv.	0.233398	3.77392	0.19	30.07	100.49	100.96
	rac. Dog	MH30	vacc.	bait	183	fox	3	surv.	0.143468	6.70355	3.32068	24.004	100.97	100.74
	rac. Dog	MH31	cont.	-	0	fox	3	died	0.105223		0.07	21.305		37.444
	rac. Dog	MH32	cont.	-	0	fox	3	died	0.0695063		0.07	17.329		28.195
	rac. Dog	MH33	cont.	-	0	fox	3	died	0.0831299		0.081887	12.138		31.583
	rac. Dog	MH34	cont.	-	0	fox	3	died	0.0210795		0.0637078	9.862		28.42
	rac. Dog	MH35	cont.	-	0	fox	3	died	0.360623		0.0663247	29.514		16.945
	rac. Dog	MH36	cont.	-	0	fox	3	died	0.208789		0.0798463	28.082		21.819
	rac. Dog	MH37	cont.	-	0	fox	3	died	0.0904516		0.066136	24.611		21.636
	rac. Dog	MH38	cont.	-	0	fox	3	died	0.113895		0.0627813	24.786		27.1
	rac. Dog	MH39	cont.	-	0	fox	3	died	0.0935849		0.0302992	26.372		34.074
	rac. Dog	MH40	cont.	-	0	fox	3	died	0.10313		0.0451099	20.502		27.573
	rac. Dog	MH41	cont.	-	0	fox	3	died	0.0264738		0.0920433	6.5043		26.593
	rac. Dog	MH42	cont.	-	0	fox	3	died	0.0828827		0.416622	6.2571		31.417
	raccoon	R1	cont.	-	180	dog(fox)	6.2	died	0.05	0.05	0.05
	raccoon	R2	cont.	-	180	dog(fox)	6.2	died	0.05	0.05	0.05
	raccoon	R3	vacc.	bait	180	dog(fox)	6.2	died	0.05	0.05	0.05
	raccoon	R4	cont.	-	180	dog(fox)	6.2	died	0.05	0.05	0.05
	raccoon	R5	vacc.	bait	180	dog(fox)	6.2	died	0.05	0.1	0.1
	raccoon	R6	vacc.	bait	180	dog(fox)	6.2	died	0.05	0.1	0.05
	raccoon	R7	cont.	-	180	dog(fox)	6.2	died	0.05	0.05	0.05
	raccoon	R8	cont.	-	180	dog(fox)	6.2	died	0.05	0.05	0.05
	raccoon	R9	cont.	-	180	dog(fox)	6.2	died	0.05	0.05	0.05
	raccoon	R10	vacc.	bait	180	dog(fox)	6.2	surv.	0.05	2.7	0.7
	raccoon	R11	vacc.	bait	180	dog(fox)	6.2	surv.	0.05	0.7	0.2
	raccoon	R12	vacc.	bait	180	dog(fox)	6.2	surv.	0.05	0.1	0.2
	raccoon	R13	vacc.	bait	180	dog(fox)	6.2	surv.	0.05	0.1	0.05
	raccoon	R14	vacc.	bait	180	dog(fox)	6.2	surv.	0.05	4.7	4.4
	raccoon	R15	vacc.	bait	180	dog(fox)	6.2	surv.	0.05	0.8	0.5
	raccoon	R16	vacc.	bait	180	dog(fox)	6.2	surv.	0.05	0.9	4.4
	raccoon	R17	vacc.	bait	180	dog(fox)	6.2	surv.	0.05	0.5	5
	raccoon	R18	cont.	-	180	dog(fox)	5.9	died	0.05	0.05	0.05
	raccoon	R19	cont.	-	180	dog(fox)	5.9	died	0.05	0.05	0.05
	raccoon	R20	vacc.	bait	180	dog(fox)	5.9	died	0.05	0.05	0.05
	raccoon	R21	cont.	-	180	dog(fox)	5.9	died	0.05	0.05	0.05
	raccoon	R22	cont.	-	180	dog(fox)	5.9	died	0.05	0.05	0.05
	raccoon	R23	cont.	-	180	dog(fox)	5.9	died	0.05	0.05	0.05
	raccoon	R24	cont.	-	180	dog(fox)	5.9	died	0.05	0.05	0.05
	raccoon	R25	vacc.	bait	180	dog(fox)	5.9	died	0.05	0.05	0.05
	raccoon	R26	vacc.	bait	180	dog(fox)	5.9	surv.	0.05	0.2	0.2
	raccoon	R27	vacc.	bait	180	dog(fox)	5.9	surv.	0.05	1.3	0.2
	raccoon	R28	vacc.	bait	180	dog(fox)	5.9	surv.	0.05	0.2	0.1
	raccoon	R29	vacc.	bait	180	dog(fox)	5.9	surv.	0.05	1.5	0.1
	raccoon	R30	vacc.	bait	180	dog(fox)	5.9	surv.	0.05	1	0.3
	raccoon	R31	vacc.	bait	180	dog(fox)	5.9	surv.	0.05	0.2	0.5
	raccoon	R32	vacc.	bait	180	dog(fox)	5.9	surv.	0.05	3.6	2.5
	raccoon	R33	vacc.	bait	180	dog(fox)	5.9	surv.	0.05	0.8	0.2
	raccoon	R34	vacc.	bait	180	dog(fox)	5.9	surv.	0.05	3.2	0.9
	raccoon	R35	vacc.	bait	180	dog(fox)	5.9	surv.	0.05	3.4	3.4
	raccoon	R36	vacc.	bait	180	dog(fox)	5.9	surv.	0.05	6.6	10
	raccoon	R37	vacc.	bait	180	dog(fox)	5.9	surv.	0.05	2.2	3.4
	raccoon	R38	vacc.	bait	180	dog(fox)	5.9	surv.	0.05	1.1	3.4
	raccoon	R39	vacc.	bait	180	dog(fox)	5.9	surv.	0.05	0.05	0.1
	raccoon	R40	vacc.	bait	180	dog(fox)	5.9	surv.	0.05	0.8	3
	raccoon	R41	vacc.	bait	180	dog(fox)	5.9	surv.	0.05	0.05	0.05
	raccoon	R42	vacc.	bait	180	dog(fox)	5.9	surv.	0.05	2	0.3
	raccoon	R43	vacc.	bait	180	dog(fox)	5.9	surv.	0.05	1	0.7
	raccoon	R44	vacc.	bait	180	dog(fox)	5.9	surv.	0.05	3	3.2
	raccoon	R45	vacc.	bait	180	dog(fox)	5.9	surv.	0.05	2.5	1
	raccoon	R46	vacc.	bait	180	dog(fox)	5.9	surv.	0.05	1.5	1.7
	raccoon	R1	cont.	-	-	dog(fox)	6.9	died	0.05		0.05	9.47		9.47
	raccoon	R2	cont.	-	-	dog(fox)	6.9	died	0.05		0.05	-5.29		-5.29
	raccoon	R3	cont.	-	-	dog(fox)	6.9	died	0.05		0.05	-4.52		-4.52
	raccoon	R4	cont.	-	-	dog(fox)	6.9	died	0.05		0.05	-12.14		-12.14
	raccoon	R5	cont.	-	-	dog(fox)	6.9	died	0.05		0.05	-15.97		-15.97
	raccoon	R6	cont.	-	-	dog(fox)	5.9	surv.	0.05		0.05	-1.25		-1.25
	raccoon	R7	cont.	-	-	dog(fox)	5.9	died	0.05		0.05	7.58		7.58
	raccoon	R8	cont.	-	-	dog(fox)	5.9	died	0.05		0.05	-7.96		-7.96
	raccoon	R9	cont.	-	-	dog(fox)	5.9	died	0.05		0.05	11.97		11.97
	raccoon	R10	cont.	-	-	dog(fox)	5.9	died	0.05		0.05	-10.25		-10.25
	skunk	SK1	cont.	-	-	dog(fox)	6.9	died	0.05		0.05	10.47		10.47
	skunk	SK2	cont.	-	-	dog(fox)	6.9	died	0.05		0.05
	skunk	SK3	cont.	-	-	dog(fox)	6.9	died	0.05		0.05	6.71		6.71
	skunk	SK4	cont.	-	-	dog(fox)	6.9	died	0.05		0.05	15.73		15.73
	skunk	SK5	cont.	-	-	dog(fox)	6.9	died	0.05		0.05	8.25		8.25
	skunk	SK6	cont.	-	-	dog(fox)	5.9	died	0.05		0.05	13.99		13.99
	skunk	SK7	cont.	-	-	dog(fox)	5.9	died	0.05		0.05	3.64		3.64
	skunk	SK8	cont.	-	-	dog(fox)	5.9	died	0.05		0.05
	skunk	SK9	cont.	-	-	dog(fox)	5.9	died	0.05		0.05	9.83		9.83
	skunk	SK10	cont.	-	-	dog(fox)	5.9	died	0.05		0.05	14.19		14.19

## Sheet: variant 2
Raw data
	Animal species	treatment	outcome challenge	RFFIT			ELISA
				B0	B28	Bch	B0	B28	Bch
	dog	cont.	died			0.28	27.72		27.72
	dog	cont.	died			0.25	26.141		26.141
	dog	cont.	died			0.34	17.555		17.555
	dog	cont.	died			0.5	21.787		21.787
	dog	vacc.	surv.	0.08	0.22	0.11	15.364	66.871	68.177
	dog	vacc.	surv.	0.09	0.3	0.08	14.37	48.35	40.961
	dog	vacc.	surv.	0.5	0.67	0.26	11.567	70.259	67.32
	dog	vacc.	surv.	0.14	0.35	0.13	20.821	61.645	62.176
	dog	vacc.	surv.	0.06	0.87	0.62	22.195	69.96	80.738
	dog	vacc.	surv.	0.06	0.42	0.21	24.25	58.121	49.861
	dog	vacc.	surv.	0.07	0.44	0.25	20.167	63.387	63.224
	dog	vacc.	surv.	0.13	0.46	0.12	21.487	56.746	61.359
	dog	vacc.	surv.	0.08	0.18	0.14	22.236	52.637	43.995
	dog	vacc.	surv.	0.05	0.7	0.42	23.039	68.64	79.935
	dog	vacc.	surv.	0.05	0.49	0.37		70.314	76.165
	dog	vacc.	surv.	0.04	0.57	0.08		51.276	48.214
	dog	vacc.	surv.	0.05	7.02	0.95	16.861	89.243	96.877
	dog	vacc.	surv.	0.29	1.36	0.64	22.671	85.405	93.461
	dog	vacc.	surv.	0.15	1.05	0.69		86.494	93.298
	dog	vacc.	surv.	0.5	4.72	0.73	29.829	82.18	90.114
	fox	cont.	died		x	x
	fox	cont.	died		x	x
	fox	cont.	died		x	x
	fox	cont.	died			x
	fox	cont.	died			x
	fox	cont.	died
	fox	cont.	died
	fox	cont.	died			0.0693065	21.86	-	-
	fox	cont.	died			0.0698356	24.434	-	-
	fox	cont.	died			0.175156	26.184	-	-
	fox	cont.	died			0.0280501	17.485	-	-
	fox	cont.	died						1.911
	fox	cont.	died						19.615
	fox	cont.	died				6.0676		6.0676
	fox	cont.	died				1.3286		1.3286
	fox	cont.	died				7.4331		7.4331
	fox	cont.	died				6.5696		6.5696
	fox	cont.	died				11.322		11.322
	fox	cont.	died				12.554		12.554
	fox	cont.	died				16.57		16.57
	fox	cont.	died				15.633		15.633
	fox	cont.	died				7.8815		7.8815
	fox	cont.	died				7.8548		7.8548
	fox	cont.	died				7.0917		7.0917
	fox	cont.	died				3.243		3.243
	fox	cont.	died				10.291		10.291
	fox	cont.	died				2.9886		2.9886
	fox	cont.	died				2.259		2.259
	fox	cont.	died				10.894		10.894
	fox	cont.	died				3.7985		3.7985
	fox	cont.	died				3.0087		3.0087
	fox	cont.	died	0.05	0.7	0.08	6.5	13.08	15.75
	fox	cont.	died	0.19	0.19	0.14	15.31	19.92	19.82
	fox	cont.	died	0.05	0.16	0.05	16.53	18.58	16.48
	fox	cont.	died	0.15	0.14	0.14	18.07	12.1	22.8
	fox	cont.	died	0.04		0.17	22.794		25.513
	fox	cont.	died	0.05		0.02	21.317		24.978
	fox	cont.	died	0.1		0.21	15.722		20.839
	fox	cont.	died	0.11		0.14	28.304		17.17
	fox	cont.	died	0.1		0.12	26.395		18.577
	fox	cont.	died	0.07		0.15	26.922		22.021
	fox	cont.	died	0.05		0.15	26.762		22.312
	fox	cont.	died	0.06		0.13	27.204		23.073
	fox	cont.	died	0.26		0.35	22.483		20.783
	fox	cont.	died	0.38		0.11	10.41		21.336
	fox	cont.	died	0.11		0.17	9.0366		19.938
	fox	cont.	died	0.36		0.13	18.29		13.341
	fox	vacc.	died	0.22	0.07	0.61	1.0624	25.376	20.685
	fox	vacc.	died	0.5	0.62	2.73	12.669	28.651	18.002
	fox	vacc.	died	0.14	0.29	1.42	18.544	59.163	59.747
	fox	vacc.	died	<0,5	5.64942	2.54595	8.9864	78.586	89.26
	fox	vacc.	died	0.0154929	0.209886	1.32821	17.927	80.477	83.885
	fox	vacc.	died	0.11	0.11105	0.108339	27.776	21.876	19.477
	fox	vacc.	died				3.39	27.359	17.031
	fox	vacc.	died	0.01	0.09	0.06	9.41	13.14	10.4
	fox	vacc.	died	0.07	0.15	0.07	10.43	9.11	4.06
	fox	vacc.	died	0.07	0.15	0.17	19.94	18.76	15.03
	fox	vacc.	died	0.62	0.26	0.17	25.04	19.86	18.42
	fox	vacc.	died	0.07	0.21	0.11	34.388	68.323	78.49
	fox	vacc.	surv.	x	0.98	0.79
	fox	vacc.	surv.	x	0.86	0.67
	fox	vacc.	surv.	x	10.83	7.85
	fox	vacc.	surv.	x	3.96	10.65
	fox	vacc.	surv.	x	1.13	3.76
	fox	vacc.	surv.	<0,5	x	x
	fox	vacc.	surv.		5.99	5.14
	fox	vacc.	surv.		8.67	19.73
	fox	vacc.	surv.		3.24	1.61
	fox	vacc.	surv.		2.73	0.54
	fox	vacc.	surv.		0.87	0.43
	fox	vacc.	surv.		2.72	3.82
	fox	vacc.	surv.	0.07	1.97	4.5
	fox	vacc.	surv.	0.06	1.97	4.5
	fox	vacc.	surv.	0.06	1.14	1.97
	fox	vacc.	surv.	0.06	30.77	13.5
	fox	vacc.	surv.	0.06	23.28	30.77
	fox	vacc.	surv.	0.06	5.92	7.79
	fox	vacc.	surv.	0.05	0.36	1.17	17.81	79.944	87.702
	fox	vacc.	surv.	0.16	0.57	2.09	20.118	83.31	96.109
	fox	vacc.	surv.	0.15	0.15	0.69	15.802	73.678	88.276
	fox	vacc.	surv.	<0,5	4.47701	2.24687	14.061	80.386	95.159
	fox	vacc.	surv.	0.0252308	0.0793277	0.366944	23.785	43.032	-
	fox	vacc.	surv.	<0,5	1.5554	1.71677	25.209	76.578	-
	fox	vacc.	surv.				-0.36	77.654	94.695
	fox	vacc.	surv.				3.43	80.639	93.631
	fox	vacc.	surv.				5.85	78.457	91.931
	fox	vacc.	surv.				1.96	84.608	96.456
	fox	vacc.	surv.				1.91	87.272	98.712
	fox	vacc.	surv.				2.15	92.098	99.26
	fox	vacc.	surv.				4.33	26.342	32.192
	fox	vacc.	surv.				-0.05	78.156	95.445
	fox	vacc.	surv.	0.11	4.47	0.72	10.55	73.4	97.33
	fox	vacc.	surv.	0.11	0.12	0.01	5.37	22.79	34.51
	fox	vacc.	surv.	0.07	3.69	0.06	-10.09	80.6	91.48
	fox	vacc.	surv.	0.09	0.18	0.08	6.25	57.85	84.16
	fox	vacc.	surv.	0.1	1.98	1.62	8.78	76.14	92.32
	fox	vacc.	surv.	0.05	13.88	2.72	6.12	84.31	97.25
	fox	vacc.	surv.	0.05	1.51	0.26	4.95	71.09	90.58
	fox	vacc.	surv.	0.1	1.53	0.12	3.23	53.9	81.82
	fox	vacc.	surv.	0.11	0.59	0.2	7.89	55.63	67.11
	fox	vacc.	surv.	0.2	0.48	0.25	10.18	64.67	89.28
	fox	vacc.	surv.	0.16	0.17	0.28	7.62	53.78	51.04
	fox	vacc.	surv.	0.12	0.51	0.74	2.99	46.26	69.09
	fox	vacc.	surv.	0.24	15.82	3.26	7.97	77.92	93.97
	fox	vacc.	surv.	0.05	1.43	0.38	10.56	68.06	84.31
	fox	vacc.	surv.	0.07	7.18	4.06	16.4	86.59	94.11
	fox	vacc.	surv.	0.74	0.68	0.26	5.42	60.1	90.35
	fox	vacc.	surv.	0.07	1.15	0.19	23.16	86.427	94.416
	fox	vacc.	surv.	0.06	0.25	0.13	38.968	70.509	52.738
	fox	vacc.	surv.	0.02	2.32	4.59	33.523	90.036	99.775
	fox	vacc.	surv.	0.09	1.64	1.46	33.702	89.304	97.701
	fox	vacc.	surv.	0.02	2.77	1.23	29.677	88.716	98.658
	fox	vacc.	surv.	0.06	0.32	0.26	23.988	80.643	86.833
	fox	vacc.	surv.	0.02	1.98	0.68	21.609	87.139	94.744
	fox	vacc.	surv.	0.02	2.55	0.68	29.197	85.829	90.24
	fox	vacc.	surv.	0.07	1.1	0.27	32.846	82.674	93.205
	fox	vacc.	surv.	0.04	1.3	0.08	40.585	75.014	62.555
	fox	vacc.	surv.	0.06	1.61	0.04	34.943	50.436	63.399
	fox	vacc.	surv.	0.09	2.56	2.12	31.078	86.778	100.23
	fox	vacc.	surv.	0.09	6.04	1.54	26.489	89.314	100.66
	fox	vacc.	surv.	0.04	0.5	0.11	24.815	75.457	79.888
	fox	vacc.	surv.	0.06	1.27	0.95	24.665	85.468	99.043
	fox	vacc.	surv.	0.06	2.6	1.81	25.107	78.54	100.23
	fox	vacc.	surv.	0.09	2.06	0.63	32.442	73.045	94.989
	fox	vacc.	surv.	0.08	0.5	0.67	33.626	73.684	97.438
	fox	vacc.	surv.	0.07	0.69	1.44	32.479	87.207	99.324
	fox	vacc.	surv.	0.06	2.7	1.47	28.793	85.073	100.29
	fox	vacc.	surv.	0.08	4.11	2.04	30.711	86.521	100.26
	fox	vacc.	surv.	0.05	1.41	1.74	23.885	88.302	98.508
	fox	vacc.	surv.	0.03	0.82	0.35	24.909	82.983	97.363
	fox	vacc.	surv.	0.07	3.08	2.17	21.505	89.584
	fox	vacc.	surv.	0.07	1.46	8.75	26.583	89.131	100.47
	fox	vacc.	surv.	0.08	0.43	0.23	36.598	73.795	86.655
	fox	vacc.	surv.	0.05	0.65	0.6	28.991	77.676
	fox	vacc.	surv.	0.09	0.13	0.17	33.278	60.548	92.652
	mongoose	cont.	died			<0,5	35.385
	mongoose	cont.	died			<0,5	23.932
	mongoose	cont.	died			<0,5	23.551		26.97
	mongoose	cont.	died			<0,5	20.852
	mongoose	cont.	died			0.03
	mongoose	cont.	died			0.03	15.331		15.331
	mongoose	cont.	died			0.02	13.806		13.806
	mongoose	vacc.	died	<0,5	<0,5	<0,5	3.0167	28.092	38.126
	mongoose	vacc.	died	<0,5	0.612087	<0,5	-0.38105		60.82
	mongoose	vacc.	died	<0,5	<0,5	<0,5	-8.4043	5.0913	26.79
	mongoose	vacc.	died	<0,5	<0,5	<0,5	10.024	33.84	45.991
	mongoose	vacc.	died	<0,5	<0,5	<0,5	15.941	21.127	18.407
	mongoose	vacc.	died	<0,5	<0,5	<0,5	14.501		15.2
	mongoose	vacc.	died	<0,5	<0,5	<0,5	81.027	19
	mongoose	vacc.	died	<0,5	<0,5	<0,5	4.1704	22.842	26.25
	mongoose	vacc.	died	<0,5	<0,5	0.385674	-2.3075	21.328	18.756
	mongoose	vacc.	died	<0,5	<0,5	<0,5	8.4361	15.21	19.402
	mongoose	vacc.	died	<0,5	<0,5	<0,5	16.724	13.94	20.386
	mongoose	vacc.	died	<0,5	<0,5	<0,5	18.629	11.379
	mongoose	vacc.	died	0.1	0.223526	0.49	15.589	14.75	23.721
	mongoose	vacc.	died	0.29	0.260799	0.44	-2.5806	15.23	18.121
	mongoose	vacc.	died	0.02	0.0447041	0.06	4.0821	13.29	16.459
	mongoose	vacc.	surv.	<0,5	3.52884	2.07151	25.287	87.441	90.987
	mongoose	vacc.	surv.	<0,5	3.2414	3.35894	17.677		92.173
	mongoose	vacc.	surv.	<0,5	7.33742	9.62537	13.104	94.353	98.735
	mongoose	vacc.	surv.	0.03	7.22384	2.7	19.214	93.567	95.972
	mongoose	vacc.	surv.	0.03	1.53345	0.51	18.487	90.671	90.564
	mongoose	vacc.	surv.	0.32	0.517812	0.35	1.9238	60.52	69.024
	mongoose	vacc.	surv.	0.11	18.2978	11	12.974	99.15	98.83
	mongoose	vacc.	surv.	0.06	22.695	9.42	3.6716	99.11	99.836
	mongoose	vacc.	surv.	0.03	24.5583	14.36	6.6979	100.13	99.836
	mongoose	vacc.	surv.	0.03	2.48368	2.2	9.912	95.71	95.549
	mongoose	vacc.	surv.	0.03	19.0412	11.71	23.824	99.55	99.01
	rac. dog	cont.	died
	rac. dog	cont.	died
	rac. dog	cont.	died	0.129935	0.151412	0.0857226	31.323	26.919	18.549
	rac. dog	cont.	died	0.0454748	0.148201	0.0577314	24.909	27.641	11.079
	rac. dog	cont.	died	0.06	0.121162	0.0519034	38.939	25.465	25.419
	rac. dog	cont.	died	0.04	0.0466144	0.117653	40.594	7.5983	23.129
	rac. dog	cont.	died	0.02	0.100257	0.126038	32.301	-4.2889	32.823
	rac. dog	cont.	died	0.09	0.1234	0.0961998	23.8	26.321	11.557
	rac. dog	cont.	died				6.8842		6.8842
	rac. dog	cont.	died				12.948		12.948
	rac. dog	cont.	died				11.683		11.683
	rac. dog	cont.	died				10.003		10.003
	rac. dog	cont.	died				9.5013		9.5013
	rac. dog	cont.	died				6.5964		6.5964
	rac. dog	cont.	died				7.7209		7.7209
	rac. dog	cont.	died				12.875		12.875
	rac. dog	cont.	died				14.187		14.187
	rac. dog	cont.	died				16.985		16.985
	rac. dog	cont.	died				14.367		14.367
	rac. dog	cont.	died				14.555		14.555
	rac. dog	cont.	died				11.985		11.985
	rac. dog	cont.	died				8.2229		8.2229
	rac. dog	cont.	died				6.0141		6.0141
	rac. dog	cont.	died				25.485		25.485
	rac. dog	cont.	died				11.248		11.248
	rac. dog	cont.	died				14.227		14.227
	rac. dog	cont.	died				4.7892		4.7892
	rac. dog	cont.	died				9.8561		9.8561
	rac. dog	cont.	died				7.9752		7.9752
	rac. dog	cont.	died				9.7356		9.7356
	rac. dog	cont.	died				5.7932		5.7932
	rac. dog	cont.	died				10.673		10.673
	rac. dog	cont.	died				13.116		13.116
	rac. dog	cont.	died				10.74		10.74
	rac. dog	cont.	died				8.4639		8.4639
	rac. dog	cont.	died				1.2818		1.2818
	rac. dog	cont.	died				4.3407		4.3407
	rac. dog	cont.	died				12.821		12.821
	rac. dog	cont.	died				5.1171		5.1171
	rac. dog	cont.	died				5.927		5.927
	rac. dog	cont.	died				12.139		12.139
	rac. dog	cont.	died				-2.2055		-2.2055
	rac. Dog	cont.	died	0.105223		0.07	21.305		37.444
	rac. Dog	cont.	died	0.0695063		0.07	17.329		28.195
	rac. Dog	cont.	died	0.0831299		0.081887	12.138		31.583
	rac. Dog	cont.	died	0.0210795		0.0637078	9.862		28.42
	rac. Dog	cont.	died	0.360623		0.0663247	29.514		16.945
	rac. Dog	cont.	died	0.208789		0.0798463	28.082		21.819
	rac. Dog	cont.	died	0.0904516		0.066136	24.611		21.636
	rac. Dog	cont.	died	0.113895		0.0627813	24.786		27.1
	rac. Dog	cont.	died	0.0935849		0.0302992	26.372		34.074
	rac. Dog	cont.	died	0.10313		0.0451099	20.502		27.573
	rac. Dog	cont.	died	0.0264738		0.0920433	6.5043		26.593
	rac. Dog	cont.	died	0.0828827		0.416622	6.2571		31.417
	rac. dog	cont.	surv.	0.10125	0.189852	0.0591072	39.71	26.589	23.608
	rac. dog	cont.	surv.	0.0399539	0.109285	0.0365452	24.101	32.156	18.174
	rac. dog	cont.	surv.	0.0399539	0.0594361	0.0395903	24.881	17.496	20.661
	rac. dog	cont.	surv.	0.31	0.127781	0.110389	36.203	25.826	23.936
	rac. dog	cont.	surv.	0.07	0.179896	0.213714	30.711	28.311	20.417
	rac. dog	cont.	surv.	0.07	0.154624	0.0839376	19.371	35.662	23.054
	rac. dog	cont.	surv.				7.9083		7.9083
	rac. dog	cont.	surv.				8.6914		8.6914
	rac. dog	cont.	surv.	0.08	0.07	0.07	18.728		18.728
	rac. dog	cont.	surv.	<0,5	0.11	0.11	17.585		17.585
	rac. dog	cont.	surv.				4.8159		4.8159
	rac. dog	cont.	surv.				2.2523		2.2523
	rac. dog	cont.	surv.				2.8213		2.8213
	rac. dog	cont.	surv.				10.532		10.532
	rac. dog	vacc.	died	0.0368709	0.119276	0.107411	20.339	25.599	13.19
	rac. dog	vacc.	died	0.106477	0.0612448	0.0491495	28.849	22.548	20.267
	rac. dog	vacc.	surv.	0.45	12.22	5.94	20.607	95.747	99.055
	rac. dog	vacc.	surv.	0.36	1.67	1.74	14.122	82.605	89.744
	rac. dog	vacc.	surv.	0.56	6.61	4.33	34.302	94.048	96.712
	rac. dog	vacc.	surv.	0.55	2.51	0.98	19.19	82.847	92.791
	rac. dog	vacc.	surv.	0.22	0.51	0.86	23.34	72.048	84.385
	rac. dog	vacc.	surv.	0.05	8.78	1.93	12.23	90.448	94.892
	rac. dog	vacc.	surv.	0.02	1.23374	1.7537	15.027	89.087	98.489
	rac. dog	vacc.	surv.	0.11	2.32881	3.06084	28.934	84.881	95.946
	rac. dog	vacc.	surv.	0.131529	1.64561	4.78847	-20.537	89.407	95.054
	rac. dog	vacc.	surv.	0.100557	1.42981	1.19187	23.17	82.004	99.69
	rac. dog	vacc.	surv.	0.0737714	0.123666	0.119666	27.712	3.9899	26.967
	rac. dog	vacc.	surv.	0.0362583	0.638669	0.427279	17.255	74.2	89.132
	rac. dog	vacc.	surv.	0.112362	3.87299	12.2679	16.823	91.582	99.718
	rac. dog	vacc.	surv.	0.114037	2.47855	7.09752	8.2279	90.603	95.936
	rac. dog	vacc.	surv.	0.125531	0.0592036	0.531373	14.368	66.23	83.473
	rac. dog	vacc.	surv.	0.063611	3.5662	11.3151	9.8735	89.85	99.897
	rac. dog	vacc.	surv.	0.0250078	1.34456	1.02768	28.389	84.654	98.761
	rac. dog	vacc.	surv.	0.0294018	0.0996023	0.147422	38.479	-1.6496	24.002
	rac. dog	vacc.	surv.	0.106477	0.104062	0.200811	31.012	14.578	26.113
	rac. dog	vacc.	surv.	0.134583	0.463125	0.319259	23.903	71.529	71.254
	rac. dog	vacc.	surv.	0.0851827	0.838445	0.699818	20.753	82.004	95.242
	rac. dog	vacc.	surv.	0.0250078	2.36601	1.54262	17.575	91.077	98.489
	rac. dog	vacc.	surv.	0.0368709	3.32331	0.518209	17.697	90.097	98.33
	rac. dog	vacc.	surv.	0.183754	3.05972	2.00993	24.825	88.149	99.606
	rac. dog	vacc.	surv.	0.102509	1.89989	1.67483	26.235	86.396	101.06
	rac. dog	vacc.	surv.	0.0250078	3.79462	0.547812	33.655	80.303	98.217
	rac. dog	vacc.	surv.	0.0250078	1.34005	3.44815	30.363	86.18	100.06
	rac. dog	vacc.	surv.	0.0412586	3.11827	0.898659	25.408	89.262	98.977
	rac. dog	vacc.	surv.	0.0776384	1.48648	0.931788	18.619	85.458	94.022
	rac. dog	vacc.	surv.	0.308384	2.99093	2.46734	19.822	87.644	98.095
	rac. dog	vacc.	surv.	0.160207	2.5035	1.03799	26.367	81.798	99.062
	rac. dog	vacc.	surv.	0.114037	0.0943355	0.349686	35.263	56.673	94.688
	rac. dog	vacc.	surv.	0.129935	0.365612	0.371479	38.262	66.23	96.903
	rac. dog	vacc.	surv.	0.112362	0.0937318	0.0975907	35.658	14.661	48.524
	rac. dog	vacc.	surv.	0.0440036	8.49099	8.49099	14.626	97.154	97.154
	rac. dog	vacc.	surv.	<0,5	1.27218	1.27218	23.227	94.353	94.353
	rac. dog	vacc.	surv.	0.05	6.7421	6.7421	20.992	94.334	94.334
	rac. dog	vacc.	surv.	0.08	<0.5	<0.5	18.678	92.119	92.119
	rac. dog	vacc.	surv.	0.18	4.91258	4.91258	17.188	97.601	97.601
	rac. dog	vacc.	surv.	0.28	3.88714	3.88714	9.5699	95.744	95.744
	rac. dog	vacc.	surv.	0.08	1.4139	1.4139	19.939	84.034	84.034
	rac. dog	vacc.	surv.	0.13	0.562984	0.562984	27.786	88.702	88.702
	rac. dog	vacc.	surv.	0.37	13.3429	13.3429	-4.1369	93.599	93.599
	rac. dog	vacc.	surv.	0.27	3.36806	3.36806	16.701	96.072	96.072
	rac. dog	vacc.	surv.	0.12	1.60358	1.60358	17.099	87.222	87.222
	rac. dog	vacc.	surv.	0.06	0.285399	0.285399	14.765	72.532	72.532
	rac. dog	vacc.	surv.	0.12	3.7242	3.7242	4.3653	91.711	91.711
	rac. dog	vacc.	surv.	0.16	1.64918	1.64918	13.473	92.357	92.357
	rac. dog	vacc.	surv.	0.18	1.24709	1.24709	16.761	90.033	90.033
	rac. dog	vacc.	surv.	0.11	7.84915	7.84915	13.612	92.218	92.218
	rac. Dog	vacc.	surv.	0.124669	5.59648	2.4302	11.973	97.978	100.92
	rac. Dog	vacc.	surv.	0.115418	4.2473	1.38525	18.04	97.472	100.63
	rac. Dog	vacc.	surv.	0.08	4.29	6.64	24.55	99.97	101.42
	rac. Dog	vacc.	surv.	0.08788	4.96739	2.21037	23.55	94.458	96.143
	rac. Dog	vacc.	surv.	0.10296	4.56013	1.93781	20.028	99.531	100.86
	rac. Dog	vacc.	surv.	0.0739101	8.31076	8.19316	25.445	100.59	100.91
	rac. Dog	vacc.	surv.	0.0975837	3.49727	1.31973	26.733	98.95	100.69
	rac. Dog	vacc.	surv.	0.117085	12.2635	7.4795	19.884	100.18	101.06
	rac. Dog	vacc.	surv.	0.1	0.44	2.58	18.1	96.45	100.22
	rac. Dog	vacc.	surv.	0.0825478	6.26682	1.60907	29.359	98.601	99.88
	rac. Dog	vacc.	surv.	0.06	1.29	3.07	20.28	98.32	99.76
	rac. Dog	vacc.	surv.	0.117085	8.41915	1.77013	20.1	99.514	100.63
	rac. Dog	vacc.	surv.	0.117085	7.69598	4.94347	29.782	100.2	100.98
	rac. Dog	vacc.	surv.	0.117085	2.06063	2.47309	29.885	98.485	100.66
	rac. Dog	vacc.	surv.	0.1	2.89	12.58	25.99	100.29	100.98
	rac. Dog	vacc.	surv.	0.139498	2.18714	1.62242	22.005	100.2	101.13
	rac. Dog	vacc.	surv.	0.10296	3.3972	4.74997	16.196	100.44	100.83
	rac. Dog	vacc.	surv.	0.112959	1.10941	2.47736	10.006	95.023	98.493
	rac. Dog	vacc.	surv.	0.08	0.97	4.34	17.36	91.39	97.51
	rac. Dog	vacc.	surv.	0.0740182	21.7932	8.46139	24.972	100.83	100.47
	rac. Dog	vacc.	surv.	0.117803	5.56785	12.6434	25.569	100.19	100.82
	rac. Dog	vacc.	surv.	0.0904603	3.41314	1.77955	25.641	100.52	100.93
	rac. Dog	vacc.	surv.	0.117085	2.98617	4.62508	26.352	100.24	100.92
	rac. Dog	vacc.	surv.	0.175198	0.218736	1.62408	9.5015	78.783	89.393
	rac. Dog	vacc.	surv.	0.232228	3.13333	11.9	34.077	97.181	99.772
	rac. Dog	vacc.	surv.	0.143468	2.28231	1.42959	25.775	98.045	98.742
	rac. Dog	vacc.	surv.	0.233398	3.77392	0.19	30.07	100.49	100.96
	rac. Dog	vacc.	surv.	0.143468	6.70355	3.32068	24.004	100.97	100.74
	raccoon	cont.	died			0.08
	raccoon	cont.	died			0.01
	raccoon	cont.	died			0.02	10.357		10.357
	raccoon	cont.	died			0.02	5.6199		5.6199
	raccoon	cont.	died			0.05	28.772		28.772
	raccoon	cont.	died			0.05	9.0208		9.0208
	raccoon	cont.	died				2.3398		2.3398
	raccoon	cont.	died				-10.516		-10.516
	raccoon	cont.	died				-1.356		-1.356
	raccoon	cont.	died				-3.7822		-3.7822
	raccoon	cont.	died				4.2874		4.2874
	raccoon	cont.	died				1.9543		1.9543
	raccoon	cont.	died				6.4278		6.4278
	raccoon	cont.	died				-3.4565		-3.4565
	raccoon	cont.	died				0.17947		0.17947
	raccoon	cont.	died				-0.78437		-0.78437
	raccoon	cont.	died	0.05	0.05	0.05
	raccoon	cont.	died	0.05	0.05	0.05
	raccoon	cont.	died	0.05	0.05	0.05
	raccoon	cont.	died	0.05	0.05	0.05
	raccoon	cont.	died	0.05	0.05	0.05
	raccoon	cont.	died	0.05	0.05	0.05
	raccoon	cont.	died	0.05	0.05	0.05
	raccoon	cont.	died	0.05	0.05	0.05
	raccoon	cont.	died	0.05	0.05	0.05
	raccoon	cont.	died	0.05	0.05	0.05
	raccoon	cont.	died	0.05	0.05	0.05
	raccoon	cont.	died	0.05	0.05	0.05
	raccoon	cont.	died	0.05		0.05	9.47		9.47
	raccoon	cont.	died	0.05		0.05	-5.29		-5.29
	raccoon	cont.	died	0.05		0.05	-4.52		-4.52
	raccoon	cont.	died	0.05		0.05	-12.14		-12.14
	raccoon	cont.	died	0.05		0.05	-15.97		-15.97
	raccoon	cont.	died	0.05		0.05	7.58		7.58
	raccoon	cont.	died	0.05		0.05	-7.96		-7.96
	raccoon	cont.	died	0.05		0.05	11.97		11.97
	raccoon	cont.	died	0.05		0.05	-10.25		-10.25
	raccoon	cont.	surv.			0.02
	raccoon	cont.	surv.				1.6684		1.6684
	raccoon	cont.	surv.				-3.3768		-3.3768
	raccoon	cont.	surv.	0.05		0.05	-1.25		-1.25
	raccoon	vacc.	died	0.02	0.04	0.89	7.7969	20.326	19.709
	raccoon	vacc.	died	0.02	0.06	0.04	5.8068	15.636	15.103
	raccoon	vacc.	died	0.02	0.03	0.2	6.7131	33.771	43.936
	raccoon	vacc.	died	0.02	0.03	(-)	17.972	8.3668	32.781
	raccoon	vacc.	died	0.02	0.04	0.04	-3.3495	27.324	15.589
	raccoon	vacc.	died	0.2	0.05	0.11	14.655	21.924	32.865
	raccoon	vacc.	died	0.02	0.02	0.09	13.767	15.683	17.822
	raccoon	vacc.	died	0.02	0.09	0.09	1.8266	20.326	10.656
	raccoon	vacc.	died	0.05	0.05	0.05
	raccoon	vacc.	died	0.05	0.1	0.1
	raccoon	vacc.	died	0.05	0.1	0.05
	raccoon	vacc.	died	0.05	0.05	0.05
	raccoon	vacc.	died	0.05	0.05	0.05
	raccoon	vacc.	surv.	0.03	0.34	0.36
	raccoon	vacc.	surv.	0.02	0.55	0.32
	raccoon	vacc.	surv.	0.06	0.38	0.1
	raccoon	vacc.	surv.	0.04	<0,5	<0,5
	raccoon	vacc.	surv.	0.1	<0,5	<0,5
	raccoon	vacc.	surv.		n.a.	59.1
	raccoon	vacc.	surv.		1.8	7.1
	raccoon	vacc.	surv.		7.3	8.6
	raccoon	vacc.	surv.	0.02	0.12	0.07	2.9665	70.377	77.618
	raccoon	vacc.	surv.	0.06	0.17	1.89	0.191154	72.433	77.516
	raccoon	vacc.	surv.	0.02	0.15	0.06	14.384	66.238	82.337
	raccoon	vacc.	surv.	0.03	0.03	0.11	7.2643	42.133	55.428
	raccoon	vacc.	surv.	0.07	0.58	0.34	1.8359	48.225	72.732
	raccoon	vacc.	surv.	0.02	0.02	0.04	7.7221	33.294	46.889
	raccoon	vacc.	surv.	0.06	0.09	0.1	4.4427	17.691	18.644
	raccoon	vacc.	surv.	0.02	0.2	0.04	9.2264	80.122	92.353
	raccoon	vacc.	surv.	0.02	0.02	5.4	4.1717	12.926	26.25
	raccoon	vacc.	surv.	0.03	0.3	0.26	5.2182	89.447	86.485
	raccoon	vacc.	surv.	0.02	0.12	0.05	-1.4996	22.98	42.628
	raccoon	vacc.	surv.	0.02	0.51	0.3	0.313		100.41
	raccoon	vacc.	surv.	0.05	2.7	0.7
	raccoon	vacc.	surv.	0.05	0.7	0.2
	raccoon	vacc.	surv.	0.05	0.1	0.2
	raccoon	vacc.	surv.	0.05	0.1	0.05
	raccoon	vacc.	surv.	0.05	4.7	4.4
	raccoon	vacc.	surv.	0.05	0.8	0.5
	raccoon	vacc.	surv.	0.05	0.9	4.4
	raccoon	vacc.	surv.	0.05	0.5	5
	raccoon	vacc.	surv.	0.05	0.2	0.2
	raccoon	vacc.	surv.	0.05	1.3	0.2
	raccoon	vacc.	surv.	0.05	0.2	0.1
	raccoon	vacc.	surv.	0.05	1.5	0.1
	raccoon	vacc.	surv.	0.05	1	0.3
	raccoon	vacc.	surv.	0.05	0.2	0.5
	raccoon	vacc.	surv.	0.05	3.6	2.5
	raccoon	vacc.	surv.	0.05	0.8	0.2
	raccoon	vacc.	surv.	0.05	3.2	0.9
	raccoon	vacc.	surv.	0.05	3.4	3.4
	raccoon	vacc.	surv.	0.05	6.6	10
	raccoon	vacc.	surv.	0.05	2.2	3.4
	raccoon	vacc.	surv.	0.05	1.1	3.4
	raccoon	vacc.	surv.	0.05	0.05	0.1
	raccoon	vacc.	surv.	0.05	0.8	3
	raccoon	vacc.	surv.	0.05	0.05	0.05
	raccoon	vacc.	surv.	0.05	2	0.3
	raccoon	vacc.	surv.	0.05	1	0.7
	raccoon	vacc.	surv.	0.05	3	3.2
	raccoon	vacc.	surv.	0.05	2.5	1
	raccoon	vacc.	surv.	0.05	1.5	1.7
	skunk	cont.	died			0.06
	skunk	cont.	died			0.05
	skunk	cont.	died			0.06
	skunk	cont.	died			0.44
	skunk	cont.	died			0.06
	skunk	cont.	died			0.1
	skunk	cont.	died			0.1
	skunk	cont.	died			0.1
	skunk	cont.	died				27.083		27.083
	skunk	cont.	died				25.062		25.062
	skunk	cont.	died	<0.1	<0.1	<0.1	0.32	11.71	-3.08
	skunk	cont.	died	<0.1	<0.1	<0.1	-3.4	-0.91	7.54
	skunk	cont.	died	<0.1	<0.1	<0.1	-3.47	11.71	12.19
	skunk	cont.	died	<0.1	<0.1	<0.1	1.32	0.19	16
	skunk	cont.	died	0.05		0.05	10.47		10.47
	skunk	cont.	died	0.05		0.05
	skunk	cont.	died	0.05		0.05	6.71		6.71
	skunk	cont.	died	0.05		0.05	15.73		15.73
	skunk	cont.	died	0.05		0.05	8.25		8.25
	skunk	cont.	died	0.05		0.05	13.99		13.99
	skunk	cont.	died	0.05		0.05	3.64		3.64
	skunk	cont.	died	0.05		0.05
	skunk	cont.	died	0.05		0.05	9.83		9.83
	skunk	cont.	died	0.05		0.05	14.19		14.19
	skunk	cont.	surv.			<0,5	36.253		36.253
	skunk	cont.	surv.			<0,5	24.428		24.428
	skunk	vacc.	died	0.08	1.1	0.19
	skunk	vacc.	died	0.1	0.07	0.08
	skunk	vacc.	died	0.06	0.04	0.02
	skunk	vacc.	died	0.03	0.04	0.01
	skunk	vacc.	died	0.06	0.03	0.07
	skunk	vacc.	died	0.08	0.05	0.02
	skunk	vacc.	died	0.04	0.03	0.03
	skunk	vacc.	died	0.11	0.06	0.06
	skunk	vacc.	died	0.21	0.47	0.07
	skunk	vacc.	died	0.3	0.19	0.15
	skunk	vacc.	died	0.1	0.24	0.04
	skunk	vacc.	died		0.1	0.2
	skunk	vacc.	died	0.02	0.02	0.02	27.847	58.041	58.041
	skunk	vacc.	died	0.01	0.02	0.02	30.109	31.828	31.828
	skunk	vacc.	died	0.02	0.02	0.02	26.208	20.718	20.718
	skunk	vacc.	died	0.04	0.02	0.02	24.76	21.955	21.955
	skunk	vacc.	died	0.05	0.07	0.07	24.86	25.977	25.977
	skunk	vacc.	died	0.03	0.05	0.05	15.882	19.059	19.059
	skunk	vacc.	died	0.02	0.03	<0,5	24.539	58.001	38.062
	skunk	vacc.	died	0.04	0.03	<0,5	33.498	66.638	62.023
	skunk	vacc.	died	0.06	0.03	<0,5	16.988	20.577	25.444
	skunk	vacc.	died	0.06	0.02	<0,5	30.169	26.882	23.765
	skunk	vacc.	died	0.03	0.02	<0,5	24.72	24.066	16.193
	skunk	vacc.	died	0.02	0.03	<0,5	21.894	25.293	19.471
	skunk	vacc.	died	0.02	0.02	<0,5	30.27	31.265	20.839
	skunk	vacc.	died	<0.1	<0.1	<0.1	8.2	-7.85	10.19
	skunk	vacc.	died	<0.1	<0.1	<0.1	-7.53	-1.42	23.69
	skunk	vacc.	died	<0.1	<0.1	<0.1	-2.96	15.67	14.15
	skunk	vacc.	died	<0.1	<0.1	<0.1	3.85	2.9	15.31
	skunk	vacc.	died	<0.1	<0.1	<0.1	-4.95	-9.02	8.62
	skunk	vacc.	surv.	0.21	0.19	0.18
	skunk	vacc.	surv.	0.09	1.41	0.22
	skunk	vacc.	surv.		19.2	8.2
	skunk	vacc.	surv.		0.8	0.3
	skunk	vacc.	surv.		0.7	1.2
	skunk	vacc.	surv.		1.9	0.9
	skunk	vacc.	surv.		1.6	1.4
	skunk	vacc.	surv.	0.02	0.03	0.03	24.237	27.424	27.424
	skunk	vacc.	surv.	0.04	0.05	0.05	26.53	24.519	24.519
	skunk	vacc.	surv.	<0.1	12.5	14	6.31	47.86	59
	skunk	vacc.	surv.	<0.1	31	11	5.33	50.79	56.73
	skunk	vacc.	surv.	<0.1	53	60	11	51.2	58.35
	skunk	vacc.	surv.	<0.1	20	11.5	9.77	47.75	55.5
	skunk	vacc.	surv.	<0.1	12.5	9.2	4.48	56.41	49.85
	skunk	vacc.	surv.	<0.1	34	36.5	16.74	48.83	65.5
	skunk	vacc.	surv.	<0.1	28	5.5	7.76	45.18	56.77
	skunk	vacc.	surv.	<0.1	59	54	2.43	54.48	55.19
	skunk	vacc.	surv.	<0.1	131	250	4.45	44.39	57.5
	skunk	vacc.	surv.	<0.1	0.3	0.4	11.79	29.22	45.35
	skunk	vacc.	surv.	<0.1	31	14	2.9	49.02	60.65
	skunk	vacc.	surv.	<0.1	<0.1	<0.1	1.92	19.58	24.19
	skunk	vacc.	surv.	<0.1	30	11.5	0.88	47.73	60.35
	skunk	vacc.	surv.	<0.1	0.5	0.4	4.7	33.51	43.65
	skunk	vacc.	surv.	<0.1	77	67.5	0.85	48.23	62.69
